# Supplementary material for: RNA sequencing analyses reveal novel differentially expressed genes and pathways in pancreatic cancer
Source: PubMed Central journal article supplement (PMC5522086; doi:10.18632/oncotarget.16451), 2017-03-22
Supplement: oncotarget-08-42537-s001.pdf [file oncotarget-08-42537-s001.pdf]

## RNA sequencing analyses reveal novel differentially expressed genes and pathways in pancreatic cancer

### SUPPLEMENTARY TABLES

Supplementary Table 1: Characteristics of the study population

| ID             | Tumor cell % | Age | Sex | Tumor site | Stage      | # of positive/total lymph nodes resected | Grade         | CA19-9 (U/ml)* |
|----------------|--------------|-----|-----|------------|------------|------------------------------------------|---------------|----------------|
| <b>RNA-Seq</b> |              |     |     |            |            |                                          |               |                |
| pt13           | >90          | 58  | F   | head       | resectable | 0/4                                      | low-moderate  | 56.8           |
| pt34           | 70           | 67  | M   | head       | resectable | 0/16                                     | low-moderate  | 98.1           |
| pt43           | >90          | 56  | M   | head       | resectable | 8/31                                     | low-moderate  | 616.1          |
| pt45           | >80          | 62  | F   | body       | resectable | 0/10                                     | low-moderate  | 13.9           |
| pt65           | 70           | 83  | M   | body       | resectable | 0/7                                      | moderate      | 120.4          |
| pt66           | 80           | 59  | F   | tail       | resectable | 1/4                                      | low-moderate  | 426.6          |
| pt67           | >90          | 61  | F   | body       | resectable | 0/7                                      | low-moderate  | 8              |
| pt72           | 80           | 59  | F   | head       | resectable | 0/21                                     | moderate      | 75.64          |
| pt76           | 70           | 64  | M   | head       | resectable | 1/27                                     | low-moderate  | 214            |
| pt78           | 80           | 59  | F   | head       | resectable | 1/1                                      | low-moderate  | 16.26          |
| <b>RT-PCR</b>  |              |     |     |            |            |                                          |               |                |
| pt6            | 40           | 57  | M   | head       | resectable | 0/9                                      | moderate      | 29.3           |
| pt14           | 25           | 57  | M   | head       | resectable | NA                                       | low-moderate  | 303.9          |
| pt16           | >90          | 59  | M   | head       | resectable | 2/4                                      | low-moderate  | 590.2          |
| pt23           | 20           | 61  | M   | head       | resectable | 10/11                                    | moderate      | 25.2           |
| pt26           | 40           | 73  | F   | head       | resectable | 5/32                                     | low-moderate  | 0.8            |
| pt29           | 20           | 69  | M   | head       | resectable | 0/21                                     | low-moderate  | 24             |
| pt33           | 50           | 68  | M   | body       | resectable | 1/6                                      | moderate      | 59.4           |
| pt42           | 40           | 52  | M   | head       | resectable | 0/14                                     | moderate      | 1049.5         |
| pt54           | 65           | 61  | F   | head       | resectable | 0/19                                     | high-moderate | 24.7           |
| pt56           | 15           | 53  | M   | head       | resectable | 0/7                                      | moderate      | 48.4           |
| pt58           | 60           | 65  | M   | head       | resectable | 1/4                                      | moderate      | 17.7           |
| pt61           | 50           | 72  | M   | head       | resectable | 3/18                                     | high-moderate | 955.3          |
| pt62           | 60           | 59  | F   | tail       | resectable | 0/8                                      | moderate      | 1185.4         |
| pt59           | 30           | 68  | M   | head       | resectable | 0/15                                     | low           | 36.52          |
| pt17           | 50           | 66  | F   | whole      | resectable | 27/40                                    | moderate      | 238.3          |
| pt39           | 60           | 66  | M   | head       | resectable | 0/26                                     | high-moderate | >2060          |
| pt47           | 50           | 62  | M   | head       | resectable | 0/10                                     | low-moderate  | >2060          |
| pt49           | 30           | 48  | M   | head       | resectable | 1/12                                     | low-moderate  | 734.8          |
| pt70           | 30           | 45  | F   | head       | resectable | 0/21                                     | high-moderate | 394.7          |
| pt25           | 70           | 38  | F   | head       | resectable | 0/19                                     | moderate      | 1472.1         |

\*The normal range of CA 19-9 in the blood of a healthy individual is 0-35 U/ml.

Supplementary Table 2: Specific primers for qRT-PCR

| Gene name       |         | Primer sequence (5'-3') |
|-----------------|---------|-------------------------|
| $\beta$ -actin  | Forward | GACGACATGGAGAAAATCTG    |
|                 | Reverse | ATGATCTGGGTCATCTTCTC    |
| <i>CDX1</i>     | Forward | GGAGAAGGAGTTTCATTACAG   |
|                 | Reverse | TGCTGTTTCTTCTTGTTTCC    |
| <i>HOXA10</i>   | Forward | CTCCCCTTCATAACAGAAAAAG  |
|                 | Reverse | AATTGCCTTGACACATTTCC    |
| <i>KRT16</i>    | Forward | AAAGACTACAGTCCCTACTTC   |
|                 | Reverse | TTGTCAATCTGCAAAATGGG    |
| <i>SERPINB5</i> | Forward | ATGTCCTCTTCTCTCCAATC    |
|                 | Reverse | ACCTGTCCAATTTCAATTC     |
| <i>SI</i>       | Forward | ATAGACACCTATGAAAGAGACC  |
|                 | Reverse | CATACATGAAGGGATCCAAG    |

**Supplementary Table 3: List of differentially expressed genes with FDR <0.05**

See Supplementary File 1

**Supplementary Table 4: Significant canonical pathways overrepresented by DEGs with FDR <0.01**

See Supplementary File 2

**Supplementary Table 5: Significant molecular functions overrepresented by DEGs with FDR<0.01**

See Supplementary File 3
